# Supplementary material for: PTEN signaling is required for the maintenance of spermatogonial stem cells in mouse, by regulating the expressions of PLZF and UTF1
Source: PubMed Central journal article supplement (PMC4517568; doi:10.1186/s13578-015-0034-x), 2015-07-28

Supplementary data

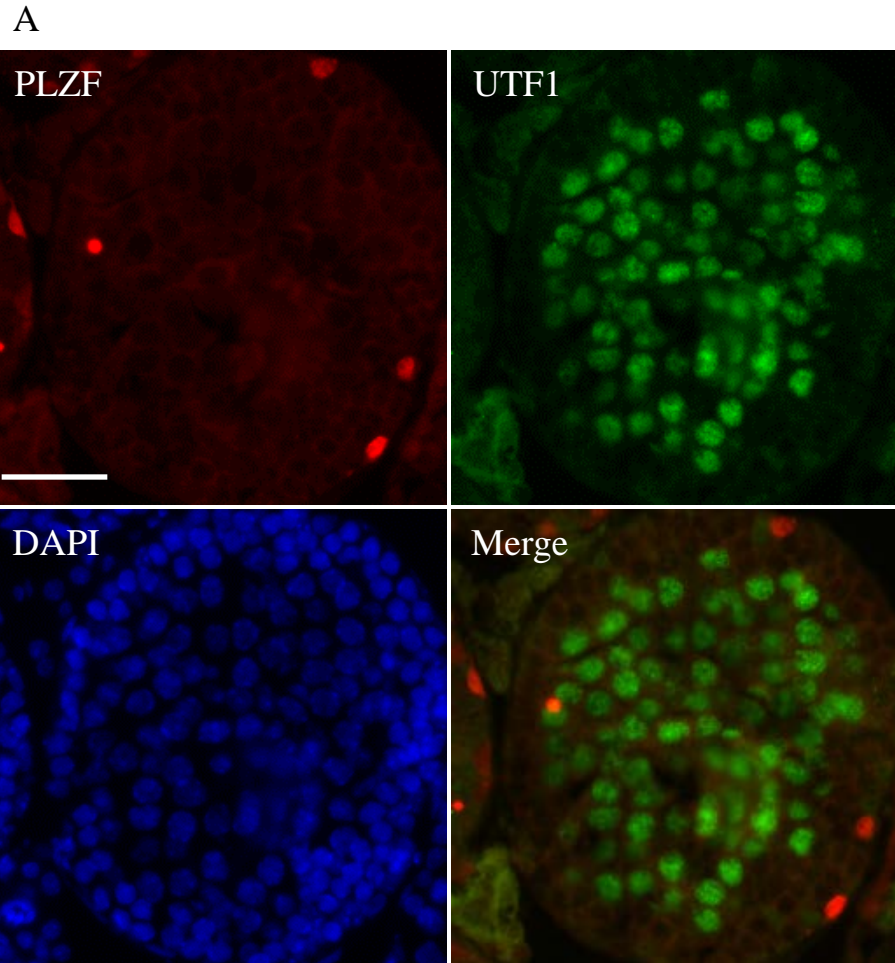

B

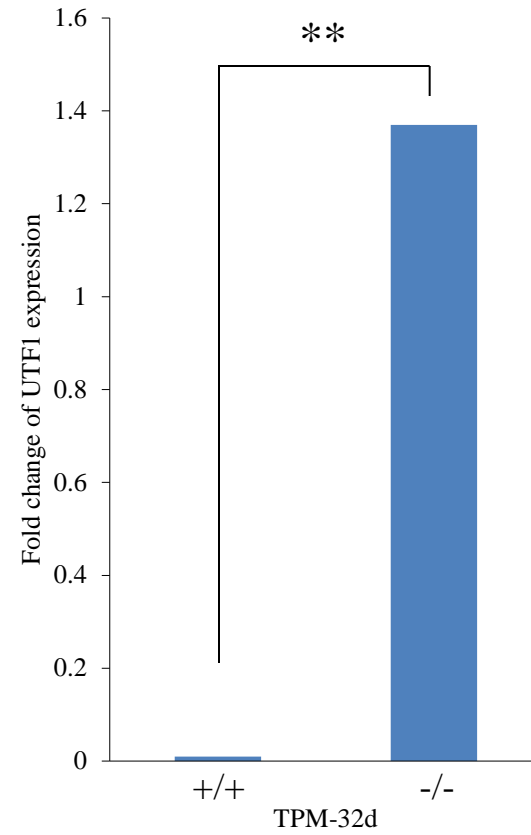

Supplement: 13578_2015_34_MOESM1_ESM.pdf [file 13578_2015_34_MOESM1_ESM.pdf]
